# Supplementary material for: The Role of Carbohydrate Intake on the Gut Microbiome: A Weight of Evidence Systematic Review
Source: MDPI journal article supplement (doi:10.3390/microorganisms11071728), 2023-06-30
Supplement: s1 [file s1]

**Supplementary table S1:** Calculation of WoE-IV / Bins count separating animal and human studies

| PREDICTIVE VARIABLE                       | RESPONSE VARIABLE         | INFORMATION VALUE (IV) | BINS | REFERENCES           | CORPORA |
|-------------------------------------------|---------------------------|------------------------|------|----------------------|---------|
| Sulfated polysaccharides                  | Lactobacillus decrease    | 1.223                  | 1    | 88                   | animal  |
| Gelatinized starch                        | Prevotella increase       | 1.610                  | 2    | 23,90                | animal  |
| Sulfated Polysaccharides                  | Desulfovibrio increase    | 1.223                  | 1    | 18                   | animal  |
| Fungal Polysaccharides                    | Proteobacteria decrease   | 1.223                  | 1    | 114                  | animal  |
| Sulfated Polysaccharides                  | Turicibacter increase     | 1.223                  | 1    | 97                   | animal  |
| Sulfated Polysaccharides                  | Odoribacter increase      | 1.223                  | 1    | 18                   | animal  |
| Oligosaccharides                          | Lactobacillus increase    | 0.941                  | 6    | 18,24,95,104,111,113 | animal  |
| Oligosaccharides                          | Enterococcus decrease     | 0.777                  | 2    | 24,104               | animal  |
| Resistant starch                          | Firmicutes increase       | 0.770                  | 1    | 96                   | animal  |
| Starch                                    | Firmicutes increase       | 0.620                  | 1    | 96                   | animal  |
| Carbohydrates naturally occurring in food | Bacteroides increase      | 0.975                  | 2    | 111,113              | animal  |
| Insoluble fiber                           | Bacteroides increase      | 0.594                  | 4    | 90,92,97,111         | animal  |
| Soluble fiber                             | Bacteroides increase      | 0.974                  | 5    | 90,92,97,109,112     | animal  |
| Insoluble fiber                           | Firmicutes decrease       | 0.371                  | 4    | 99,108,110,111       | animal  |
| Sulfated Polysaccharides                  | Roseburia increase        | 1.223                  | 1    | 97                   | animal  |
| Sulfated Polysaccharides                  | Enterococcus decrease     | 0.558                  | 1    | 97                   | animal  |
| Fructan                                   | Faecalibacterium increase | 0.347                  | 1    | 122                  | human   |

- (1) Chen, P.; Yang, S.; Hu, C.; Zhao, Z.; Liu, J.; Cheng, Y.; Wang, S.; Chen, Q.; Yu, P.; Zhang, X.; Wu, M. Sargassum Fusiforme Polysaccharide Rejuvenates the Small Intestine in Mice Through Altering Its Physiology and Gut Microbiota Composition. *Curr Mol Med* **2017**, *17* (5). <https://doi.org/10.2174/1566524018666171205115516>.
- (2) Pi, Y.; Mu, C.; Gao, K.; Liu, Z.; Peng, Y.; Zhu, W. Increasing the Hindgut Carbohydrate/Protein Ratio by Cecal Infusion of Corn Starch or Casein Hydrolysate Drives Gut Microbiota-Related Bile Acid Metabolism To Stimulate Colonic Barrier Function. *mSystems* **2020**, *5* (3), 1–16. <https://doi.org/10.1128/msystems.00176-20>.
- (3) Surono, I. S.; Venema, K. Modulation of Gut Microbiota Profile and Short-Chain Fatty Acids of Rats Fed with Taro Flour or Taro Starch. *Int J Microbiol* **2020**, *2020*. <https://doi.org/10.1155/2020/8893283>.
- (4) Shang, Q.; Shi, J.; Song, G.; Zhang, M.; Cai, C.; Hao, J.; Li, G.; Yu, G. Structural Modulation of Gut Microbiota by Chondroitin Sulfate and Its Oligosaccharide. *Int J Biol Macromol* **2016**, *89*, 489–498. <https://doi.org/10.1016/j.ijbiomac.2016.04.091>.
- (5) Zhong, L.; Ma, N.; Zheng, H.; Ma, G.; Zhao, L.; Hu, Q. Tuber Indicum Polysaccharide Relieves Fatigue by Regulating Gut Microbiota in Mice. *J Funct Foods* **2019**, *63* (April), 103580. <https://doi.org/10.1016/j.jff.2019.103580>.
- (6) Zhu, Z.; Zhu, B.; Sun, Y.; Ai, C.; Wu, S.; Wang, L.; Song, S.; Liu, X. Sulfated Polysaccharide from Sea Cucumber Modulates the Gut Microbiota and Its Metabolites in Normal Mice. *Int J Biol Macromol* **2018**, *120*, 502–512. <https://doi.org/10.1016/j.ijbiomac.2018.08.098>.
- (7) Yan, S.; Shi, R.; Li, L.; Ma, S.; Zhang, H.; Ye, J.; Wang, J.; Pan, J.; Wang, Q.; Jin, X.; Liu, X.; Liu, Z. Mannan Oligosaccharide Suppresses Lipid Accumulation and Appetite in Western-Diet-Induced Obese Mice Via Reshaping Gut Microbiome and Enhancing Short-Chain Fatty Acids Production. *Mol Nutr Food Res* **2019**, *63* (23), 1900521. <https://doi.org/10.1002/mnfr.201900521>.
- (8) Zhang, S.; Hu, H.; He, W.; Muhammad, Z.; Wang, L. Regulatory Roles of Pectin Oligosaccharides on Immunoglobulin Production in Healthy Mice Mediated by Gut Microbiota. **2019**, *1801363*, 1–8. <https://doi.org/10.1002/mnfr.201801363>.
- (9) Peerakietkhajorn, S.; Jeanmard, N.; Chuenpanitkit, P.; K-da, S.; Bannob, K.; Khuituan, P. Effects of Plant Oligosaccharides Derived from Dragon Fruit on Gut Microbiota in Proximal and Distal Colon of Mice. *Sains Malays* **2020**, *49* (3), 603–611. <https://doi.org/10.17576/jsm-2020-4903-15>.
- (10) Ou, J.; Huang, J.; Song, Y.; Yao, S.; Peng, X. Feruloylated Oligosaccharides from Maize Bran Modulated the Gut Microbiota in Rats. *Plant Foods for Human Nutrition* **2016**. <https://doi.org/10.1007/s11130-016-0547-4>.
- (11) Monteagudo-Mera, A.; Arthur, J. C.; Jobin, C.; Keku, T.; Bruno-Barcena, J. M.; Azcarate-Peril, M. A. High Purity Galacto-Oligosaccharides Enhance Specific Bifidobacterium Species and Their Metabolic Activity in the Mouse Gut Microbiome. *Benef Microbes* **2016**, *7* (2), 247–264. <https://doi.org/10.3920/BM2015.0114>.

- (12) Kaur, A.; Chen, T.; Green, S. J.; Mutlu, E.; Martin, B. R.; Rumpagaporn, P.; Patterson, J. A.; Keshavarzian, A.; Hamaker, B. R. Physical Inaccessibility of a Resistant Starch Shifts Mouse Gut Microbiota to Butyrogenic Firmicutes. *Mol Nutr Food Res* **2019**, *63* (7), 1–8. <https://doi.org/10.1002/mnfr.201801012>.
- (13) Chijiwa, R.; Hosokawa, M.; Kogawa, M.; Nishikawa, Y.; Ide, K.; Sakanashi, C.; Takahashi, K.; Takeyama, H. Single-Cell Genomics of Uncultured Bacteria Reveals Dietary Fiber Responders in the Mouse Gut Microbiota. *bioRxiv* **2019**, 1–14. <https://doi.org/10.1101/784801>.
- (14) Higashimura, Y.; Baba, Y.; Inoue, R.; Takagi, T.; Mizushima, K.; Ohnogi, H.; Honda, A.; Matsuzaki, Y.; Naito, Y. Agar-Oligosaccharides Regulate Gut Microbiota and Adipose Tissue Accumulation in Mice. *J Nutr Sci Vitaminol (Tokyo)* **2017**, *63* (4), 269–276. <https://doi.org/10.3177/jnsv.63.269>.
- (15) Zhou, S.; Xu, J.; Zhu, H.; Wu, J.; Xu, J.; Yan, R.; Li, X. Gut Microbiota-Involved Mechanisms in Enhancing Systemic Exposure of Ginsenosides by Coexisting Polysaccharides in Ginseng Decoction. *Nature Publishing Group* **2016**, No. September 2015, 1–13. <https://doi.org/10.1038/srep22474>.
- (16) Chang, S.; Cui, X.; Guo, M.; Tian, Y.; Xu, W.; Huang, K.; Zhang, Y. Insoluble Dietary Fiber from Pear Pomace Can Prevent High-Fat Diet-Induced Obesity in Rats Mainly by Improving the Structure of the Gut Microbiota. *J Microbiol Biotechnol* **2017**, *27* (4), 856–867. <https://doi.org/10.4014/jmb.1610.10058>.
- (17) Tian, G.; Wu, X.; Chen, D.; Yu, B.; He, J. Adaptation of Gut Microbiome to Different Dietary Non-Starch Polysaccharide Fractions in a Porcine Model. **2017**, 1–43. <https://doi.org/10.1002/mnfr.201700012>.
- (18) Ferrario, C.; Statello, R.; Carnevali, L.; Mancabelli, L.; Milani, C.; Mangifesta, M.; Duranti, S.; Lugli, G. A.; Jimenez, B.; Lodge, S.; Viappiani, A.; Alessandri, G.; Asta, M. D.; Rio, D. Del; Sgoifo, A.; Sinderen, D. Van; Ventura, M.; Turrone, F. How to Feed the Mammalian Gut Microbiota : Bacterial and Metabolic Modulation by Dietary Fibers. **2017**, *8* (September), 1–11. <https://doi.org/10.3389/fmicb.2017.01749>.
- (19) Healey, G.; Murphy, R.; Butts, C.; Brough, L.; Whelan, K.; Coad, J. Habitual Dietary Fibre Intake Influences Gut Microbiota Response to an Inulin-Type Fructan Prebiotic: A Randomised, Double-Blind, Placebo-Controlled, Cross-over, Human Intervention Study. *British Journal of Nutrition* **2018**, *119* (2), 176–189. <https://doi.org/10.1017/S0007114517003440>.
